# Supplementary material for: The novel function of tumor protein D54 in regulating pyruvate dehydrogenase and metformin cytotoxicity in breast cancer
Source: Cancer Metab. 2019 Jan 24;7:1. doi: 10.1186/s40170-018-0193-4 (PMC6345044; doi:10.1186/s40170-018-0193-4)
Supplement: Supplementary file 3 — Primers used in preparing PDHE1α mutants S232A, S300A and S293G, and the sequencing results. (XLSX 14 kb) [file 40170_2018_193_MOESM3_ESM.xlsx]

## Sheet: Sequencing primers
			5'----3'
		CMV-F	CGCAAATGGGCGGTAGGCGTG
			5'----3'
		SNAP2	GCGCTTCATTTCGCAGTCTTTG

## Sheet: PDHE1alphaS232A
		>1A-CMV-F_A10.ab1
		NNNNNNNNNNNNNNNAGCAGAGCTGGTTTAGTGACCGTCAGATCCGCTAGCACCGCCACCATGAGGAAGATGCTCGCCGC
		CGTCTCCCGCGTGCTGTCTGGCGCTTCTCAGAAGCCGGCAAGCAGAGTGCTGGTAGCATCCCGTAATTTTGCAAATGATG
		CTACATTTGAAATTAAGAAATGTGACCTTCACCGGCTGGAAGAAGGCCCTCCTGTCACAACAGTGCTCACCAGGGAGGAT
		GGGCTCAAATACTACAGGATGATGCAGACTGTACGCCGAATGGAGTTGAAAGCAGATCAGCTGTATAAACAGAAAATTAT
		TCGTGGTTTCTGTCACTTGTGTGATGGTCAGGAAGCTTGCTGTGTGGGCCTGGAGGCCGGCATCAACCCCACAGACCATC
		TCATCACAGCCTACCGGGCTCACGGCTTTACTTTCACCCGGGGCCTTTCCGTCCGAGAAATTCTCGCAGAGCTTACAGGA
		CGAAAAGGAGGTTGTGCTAAAGGGAAAGGAGGATCGATGCACATGTATGCCAAGAACTTCTACGGGGGCAATGGCATCGT
		GGGAGCGCAGGTGCCCCTGGGCGCTGGGATTGCTCTAGCCTGTAAGTATAATGGAAAAGATGAGGTCTGCCTGACTTTAT
		ATGGCGATGGTGCTGCTAACCAGGGCCAGATATTCGAAGCTTACAACATGGCAGCTTTGTGGAAATTACCTTGTATTTTC
		ATCTGTGAGAATAATCGCTATGGAATGGGAACGGCTGTTGAGAGAGCGGCAGCCAGCACTGATTACTACAAGAGAGGCGA
		TTTCATTCCTGGGCTGAGAGTGGATGGAATGGATATCCTGTGCGTCCGANAGGCAACAAGGTTTGCTGCTGCCTATTGTA
		GATCTGGGAAGGGGCCCATCCTGATGGAGCTGCAGACTTACCGTTACCACGGNACACAGTATGAGTGACCCTGNNNTCAG
		TTACNCGTACACGAGAAGAAATTCNNNAGTAAGAAGTAAGAGTGACCCTATNTGCTNCTCAAGGACAGGATGGNNANAGC
		ATCTTGNCNNTGTNNNANTAANNNAATGATGTNNNTGNNNNNNNNTGNNGNTGCTGCCANTTNNCNCNNNATNCNGANCC
		NNCTNNNNANNNNCTNNN
		>1A-SNAP2_B10.ab1
		NNNNNNNNNNNNGNNCCCTCCGGAGCTACTGACTGACTTAAACTTGATCCACTGATTGGCACCACGAACTTCAAAAGGTG
		GGTCGCTGGAGTAGATGTGGTAGCCCAGCTCTTCCAAAGGTGGCTCAGGATCGGCCGTGGCAAACTGGGCAGCATCCTCA
		ATCTCCTTCCTCACTTCCACATCAATTTCCTTTAGTTCTTCCACACTGGCAAGATTGCTGTTCACCATCCTGTCCTTGAG
		AAGCATAATAGGGTCACTCTTACTTCTTACTTCCTGAATTTCTTCTCGTGTACGGTAACTGACTCCAGGGTCACTCATAC
		TGTGTCCGTGGTAACGGTAAGTCTGCAGCTCCATCAGGATGGGCCCCTTCCCAGATCTACAATAGGCAGCAGCAAACCTT
		GTTGCCTCTCGGACGCACAGGATATCCATTCCATCCACTCTCAGCCCAGGAATGAAATCGCCTCTCTTGTAGTAATCAGT
		GCTGGCTGCCGCTCTCTCAACAGCCGTTCCCATTCCATAGCGATTATTCTCACAGATGAAAATACAAGGTAATTTCCACA
		AAGCTGCCATGTTGTAAGCTTCGAATATCTGGCCCTGGTTAGCAGCACCATCGCCATATAAAGTCAGGCAGACCTCATCT
		TTTCCATTATACTTACAGGCTAGAGCAATCCCAGCGCCCAGGGGCACCTGCGCTCCCACGATGCCATTGCCCCCGTAGAA
		GTTCTTGGCATACATGTGCATCGATCCTCCTTTCCCTTTAGCACAACCTCCTTTTCGTCCTGTAAGCTCTGCGAGAATTT
		CTCGGACGGAAAGGCCCCGGGTGAAAGTAAAGCCGTGAGCCCGGTAGGCTGTGATGAGATGGTCTGTGGGGTTGATGCCG
		GCCTCCAGGCCCACACAGCAAGCTTCCTGACCATCACACAAGTGACAGAAACCACGAATAATTTTCTGTTTATACAGCTG
		ATCTGCTTTCAACTCCATTCGGCGTACAGTCTGCATCATCNNGNAGTATTTGAGCCCATCCNNCCTGGNNAGCACTNNNN
		GACNNAGGGNNNCNTCNNNNNTNNNNCACNTTTCTNNTTCAANGTANCATCANTGCAAANNNNNNGCTNCNNNANNNNGC
		TNNNNTNNNGNNNAAAGCGNNCNNNAANNNN

## Sheet: PDHE1alphaS293G
		>3A-CMV-F_A11.ab1
		NNNNNNNNNNNNNNNNAGCAGAGCTGGTTTAGTGAACCGTCAGATCCGCTAGCACCGCCACCATGAGGAAGATGCTCGCC
		GCCGTCTCCCGCGTGCTGTCTGGCGCTTCTCAGAAGCCGGCAAGCAGAGTGCTGGTAGCATCCCGTAATTTTGCAAATGA
		TGCTACATTTGAAATTAAGAAATGTGACCTTCACCGGCTGGAAGAAGGCCCTCCTGTCACAACAGTGCTCACCAGGGAGG
		ATGGGCTCAAATACTACAGGATGATGCAGACTGTACGCCGAATGGAGTTGAAAGCAGATCAGCTGTATAAACAGAAAATT
		ATTCGTGGTTTCTGTCACTTGTGTGATGGTCAGGAAGCTTGCTGTGTGGGCCTGGAGGCCGGCATCAACCCCACAGACCA
		TCTCATCACAGCCTACCGGGCTCACGGCTTTACTTTCACCCGGGGCCTTTCCGTCCGAGAAATTCTCGCAGAGCTTACAG
		GACGAAAAGGAGGTTGTGCTAAAGGGAAAGGAGGATCGATGCACATGTATGCCAAGAACTTCTACGGGGGCAATGGCATC
		GTGGGAGCGCAGGTGCCCCTGGGCGCTGGGATTGCTCTAGCCTGTAAGTATAATGGAAAAGATGAGGTCTGCCTGACTTT
		ATATGGCGATGGTGCTGCTAACCAGGGCCAGATATTCGAAGCTTACAACATGGCAGCTTTGTGGAAATTACCTTGTATTT
		TCATCTGTGAGAATAATCGCTATGGAATGGGAACGTCTGTTGAGAGAGCGGCAGCCAGCACTGATTACTACAAGAGAGGC
		GATTTCATTCCTGGGCTGAGAGTGGATGGAATGGATATCCTGTGCGTCCGANAGGCAACAAGGTTTGCTGCTGCCTATTG
		TAGATCTGGGAAGGGGCCCATCCTGATGGAGCTGCAGACTTACCGTTACCACGGACACNCTATGAGTGACCCNGNNNTCA
		GTTACCGTACACGAGAAGAAATTCNNNAGTAGANTANNNTGACCNTATTATGCTNNTCNNNACAGGATGGNGACAGCANC
		NTGNCAGNGTNNNNNTNANNNAATGATGTNNNNTGANNNNNNGAGATGCTNCCNNTTNNCNCGGGNNATCNGNNN
		>3A-SNAP2_B11.ab1
		NNNNNNNNNNNNNNNGNNNNNNCCGGANCTACTGACTGACTTAAACTTGATCCACTGATTGGCACCACGAACTTCAAAAG
		GTGGGTCGCTGGAGTAGATGTGGTAGCCCAGCTCTTCCAAAGGTGGCTCAGGATCGGCCGTGGCAAACTGGGCAGCATCC
		TCAATCTCCTTCCTCACTTCCACATCAATTTCCTTTAGTTCTTCCACACTGGCAAGATTGCTGTTCACCATCCTGTCCTT
		GAGAAGCATAATAGGGTCACTCTTACTTCTTACTTCCTGAATTTCTTCTCGTGTACGGTAACTGACTCCAGGGTCACTCA
		TACCGTGTCCGTGGTAACGGTAAGTCTGCAGCTCCATCAGGATGGGCCCCTTCCCAGATCTACAATAGGCAGCAGCAAAC
		CTTGTTGCCTCTCGGACGCACAGGATATCCATTCCATCCACTCTCAGCCCAGGAATGAAATCGCCTCTCTTGTAGTAATC
		AGTGCTGGCTGCCGCTCTCTCAACAGACGTTCCCATTCCATAGCGATTATTCTCACAGATGAAAATACAAGGTAATTTCC
		ACAAAGCTGCCATGTTGTAAGCTTCGAATATCTGGCCCTGGTTAGCAGCACCATCGCCATATAAAGTCAGGCAGACCTCA
		TCTTTTCCATTATACTTACAGGCTAGAGCAATCCCAGCGCCCAGGGGCACCTGCGCTCCCACGATGCCATTGCCCCCGTA
		GAAGTTCTTGGCATACATGTGCATCGATCCTCCTTTCCCTTTAGCACAACCTCCTTTTCGTCCTGTAAGCTCTGCGAGAA
		TTTCTCGGACGGAAAGGCCCCGGGTGAAAGTAAAGCCGTGAGCCCGGTAGGCTGTGATGAGATGGTCTGTGGGGTTGATG
		CCGGCCTCCAGGCCCACACAGCAAGCTTCCTGACCATCACACAAGTGACAGAAACCACGAATAATTTTCTGTTTATACAG
		CTGATCTGCTTTCAACTCCATTCGGCGTACAGTCTGCATCATCCTGTAGTATTTGAGCCCATCCTCCCTNNNANCACTNN
		NTGACAGGANGGNNTTCTTCNNCCNNNNNNCNNATTTCNNNNTTNNNNGTANCATCATTTGCAAANTNANGGANGCTACC
		ANNNN

## Sheet: PDHE1alphaS300A
		>2B-CMV-F_G10.ab1
		NNNNNNNNNNNNNNNAGCAGAGCTGGTTTAGTGAACCGTCAGATCCGCTAGCACCGCCACCATGAGGAAGATGCTCGCCG
		CCGTCTCCCGCGTGCTGTCTGGCGCTTCTCAGAAGCCGGCAAGCAGAGTGCTGGTAGCATCCCGTAATTTTGCAAATGAT
		GCTACATTTGAAATTAAGAAATGTGACCTTCACCGGCTGGAAGAAGGCCCTCCTGTCACAACAGTGCTCACCAGGGAGGA
		TGGGCTCAAATACTACAGGATGATGCAGACTGTACGCCGAATGGAGTTGAAAGCAGATCAGCTGTATAAACAGAAAATTA
		TTCGTGGTTTCTGTCACTTGTGTGATGGTCAGGAAGCTTGCTGTGTGGGCCTGGAGGCCGGCATCAACCCCACAGACCAT
		CTCATCACAGCCTACCGGGCTCACGGCTTTACTTTCACCCGGGGCCTTTCCGTCCGAGAAATTCTCGCAGAGCTTACAGG
		ACGAAAAGGAGGTTGTGCTAAAGGGAAAGGAGGATCGATGCACATGTATGCCAAGAACTTCTACGGGGGCAATGGCATCG
		TGGGAGCGCAGGTGCCCCTGGGCGCTGGGATTGCTCTAGCCTGTAAGTATAATGGAAAAGATGAGGTCTGCCTGACTTTA
		TATGGCGATGGTGCTGCTAACCAGGGCCAGATATTCGAAGCTTACAACATGGCAGCTTTGTGGAAATTACCTTGTATTTT
		CATCTGTGAGAATAATCGCTATGGAATGGGAACGTCTGTTGAGAGAGCGGCAGCCAGCACTGATTACTACAAGAGAGGCG
		ATTTCATTCCTGGGCTGAGAGTGGATGGAATGGATATCCTGTGCGTCCGANAGGCAACNANGGTTTGCTGCTGCCTATTG
		TAGATCTGGGAAGGGGCCCATCCTGATGGAGCTGCAGACTTACCGTTACCACGGACACAGTATGAGTGACCCTGGNNTCG
		CTTACCGTACACGANAAGAAATTCNNNAGTAAGAAGTANAGTGACCCTNNTNATGCTTNTCAGNACNGNATGGNGANAGC
		ANNTTGNCNNNNNNNNNANTAANAANNATGTNGNNNNNNNNNNNANTGAGNTGCTNCCCANTNGCCNCNN
		>2B-SNAP2_H10.ab1
		NNNNNNNNNNNNNNGNNCCTCCGGANCTACTGACTGACTTAAACTTGATCCACTGATTGGCACCACGAACTTCAAAAGGT
		GGGTCGCTGGAGTAGATGTGGTAGCCCAGCTCTTCCAAAGGTGGCTCAGGATCGGCCGTGGCAAACTGGGCAGCATCCTC
		AATCTCCTTCCTCACTTCCACATCAATTTCCTTTAGTTCTTCCACACTGGCAAGATTGCTGTTCACCATCCTGTCCTTGA
		GAAGCATAATAGGGTCACTCTTACTTCTTACTTCCTGAATTTCTTCTCGTGTACGGTAAGCGACTCCAGGGTCACTCATA
		CTGTGTCCGTGGTAACGGTAAGTCTGCAGCTCCATCAGGATGGGCCCCTTCCCAGATCTACAATAGGCAGCAGCAAACCT
		TGTTGCCTCTCGGACGCACAGGATATCCATTCCATCCACTCTCAGCCCAGGAATGAAATCGCCTCTCTTGTAGTAATCAG
		TGCTGGCTGCCGCTCTCTCAACAGACGTTCCCATTCCATAGCGATTATTCTCACAGATGAAAATACAAGGTAATTTCCAC
		AAAGCTGCCATGTTGTAAGCTTCGAATATCTGGCCCTGGTTAGCAGCACCATCGCCATATAAAGTCAGGCAGACCTCATC
		TTTTCCATTATACTTACAGGCTAGAGCAATCCCAGCGCCCAGGGGCACCTGCGCTCCCACGATGCCATTGCCCCCGTAGA
		AGTTCTTGGCATACATGTGCATCGATCCTCCTTTCCCTTTAGCACAACCTCCTTTTCGTCCTGTAAGCTCTGCGAGAATT
		TCTCGGACGGAAAGGCCCCGGGTGAAAGTAAAGCCGTGAGCCCGGTAGGCTGTGATGAGATGGTCTGTGGGGTTGATGCC
		GGCCTCCAGGCCCACACAGCAAGCTTCCTGACCATCACACAAGTGACAGAAACCACGAATAATTTTCTGTTTATACAGCT
		GATCTGCTTTCAACTCCATTCGGCGTACAGTCTGCATCATCCTGTAGTANTTGAGCCCATCCNCCNNNNAGCACTNNNTG
		ACNGNNGGNNNCTTCNNNNNTNNNNTCACATTTCNTAATTCAAATGNAGCATCATTTGCAAANTACGNN
